# Supplementary material for: A post-translational modification signature defines changes in soluble tau correlating with oligomerization in early stage Alzheimer’s disease brain
Source: PubMed Central journal article supplement (PMC6892178; doi:10.1186/s40478-019-0823-2), 2019-12-03
Supplement: 40478_2019_823_MOESM2_ESM.pdf [file 40478_2019_823_MOESM2_ESM.pdf]

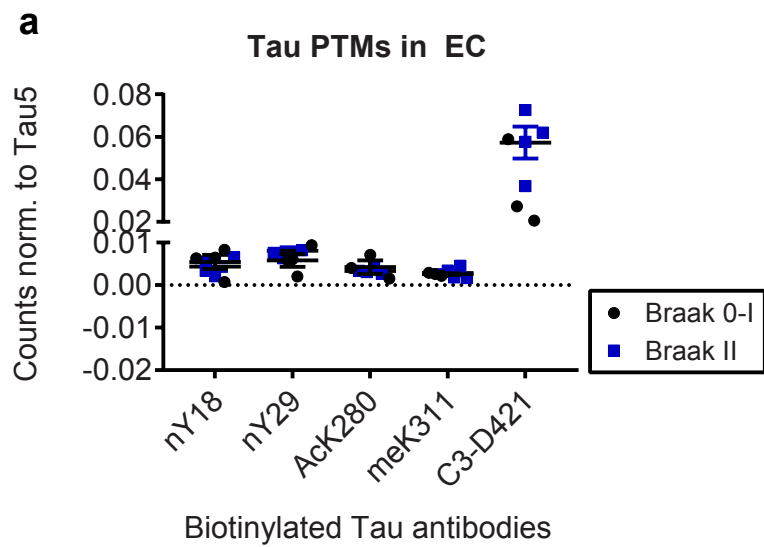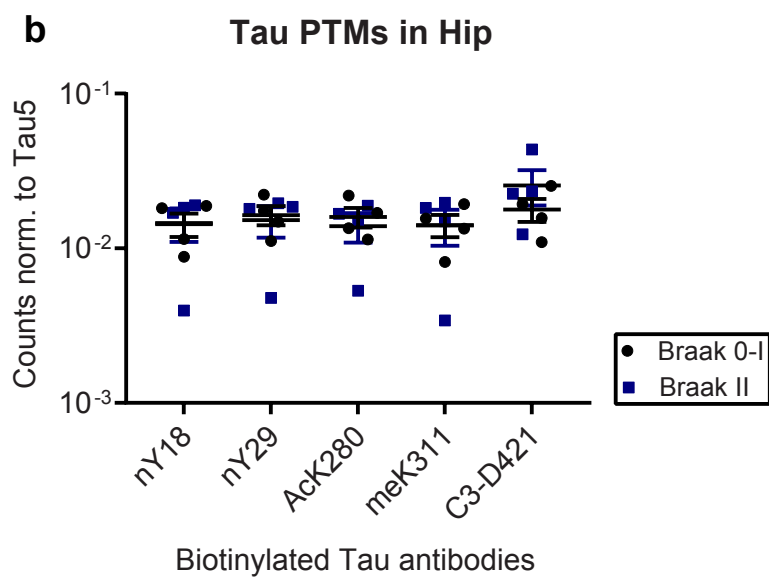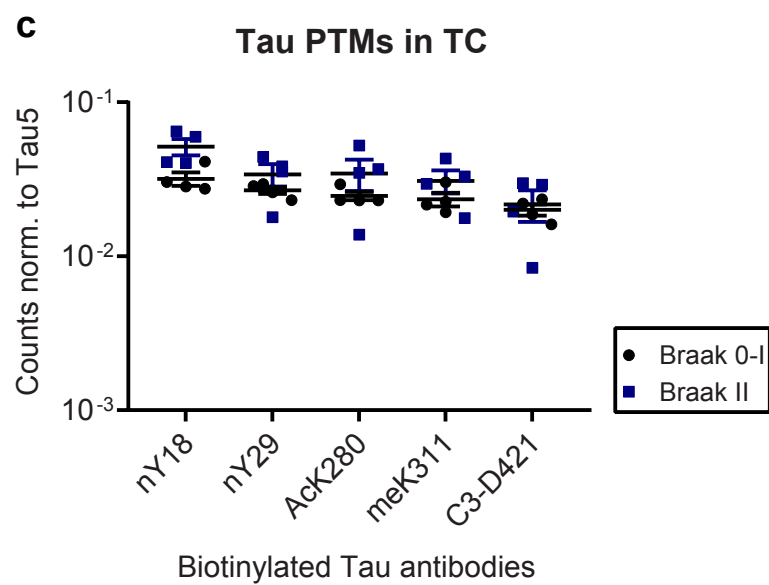

Supplementary Figure 1
